# Supplementary material for: Particulate Matter in an Urban–Industrial Environment: Comparing Data of Dispersion Modeling with Tree Leaves Deposition
Source: MDPI journal article supplement (doi:10.3390/su14020793), 2022-01-11
Supplement: s1 [file s1]

# Particulate Matter in an Urban–Industrial Environment: Comparing Data of Dispersion Modeling with Tree Leaves Deposition

Sgrigna, G.; Relvas, H; Miranda, A. I.; Calfapietra, C.

## Supplementary Material

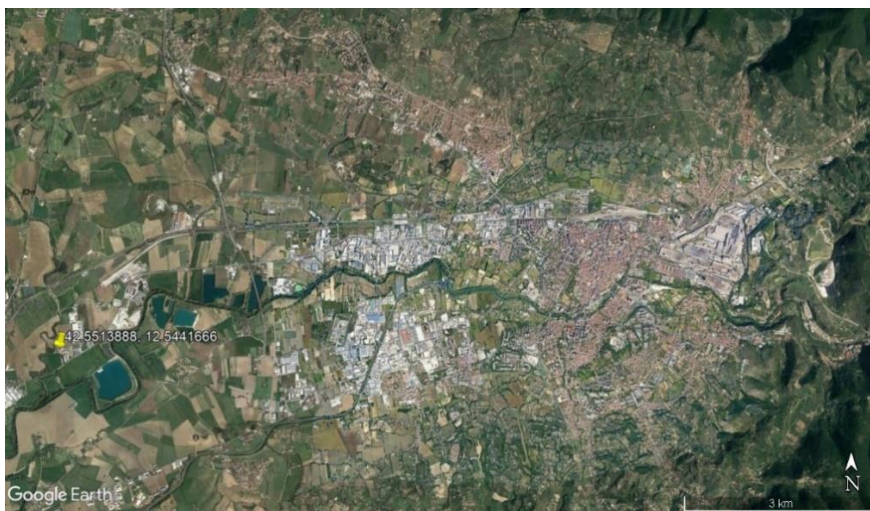

**Figure S1** – Narni Scalo (Terni – Italy) Meteorological station position.

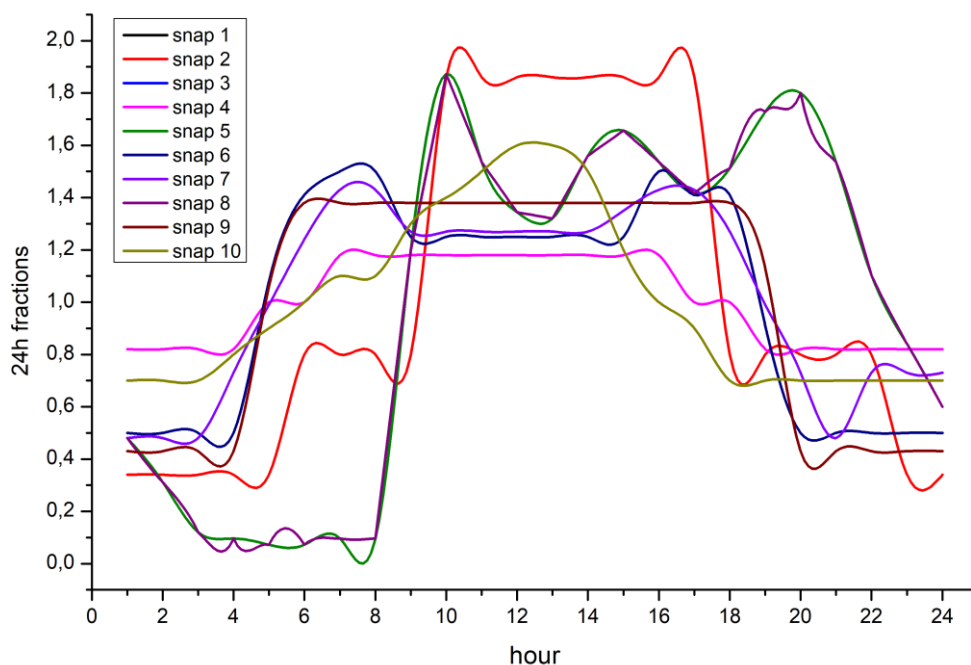

**Figure S2** – Daily profile per each macro-sector (SNAPs) adopted for temporal disaggregation process on annual emissions database. SNAPs codes: 1) Power plants; 2) House heating; 3) Industrial combustion; 4) Production process (steel); 5) Solvents; 6) Transport; 7) Other mobile sources; 8) Waste management; 9) Agriculture; 10) Nature.

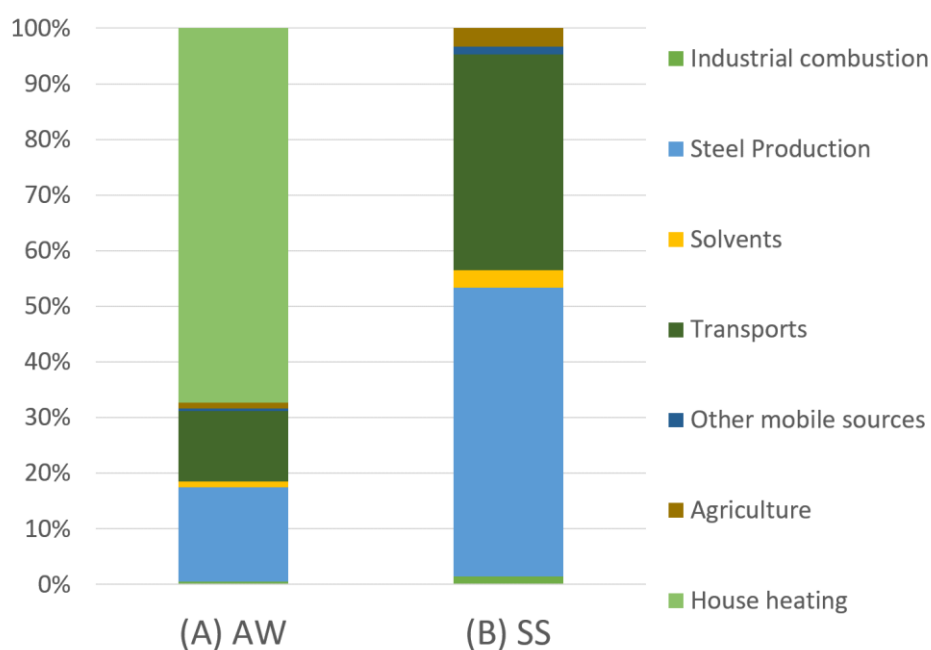

**Figure S3** – PM10 emissions contribution (%) for autumn-winter (A) and spring-summer (B) period in Terni area for the main pollutants sectors for 2012 (source: ARPA Umbria).

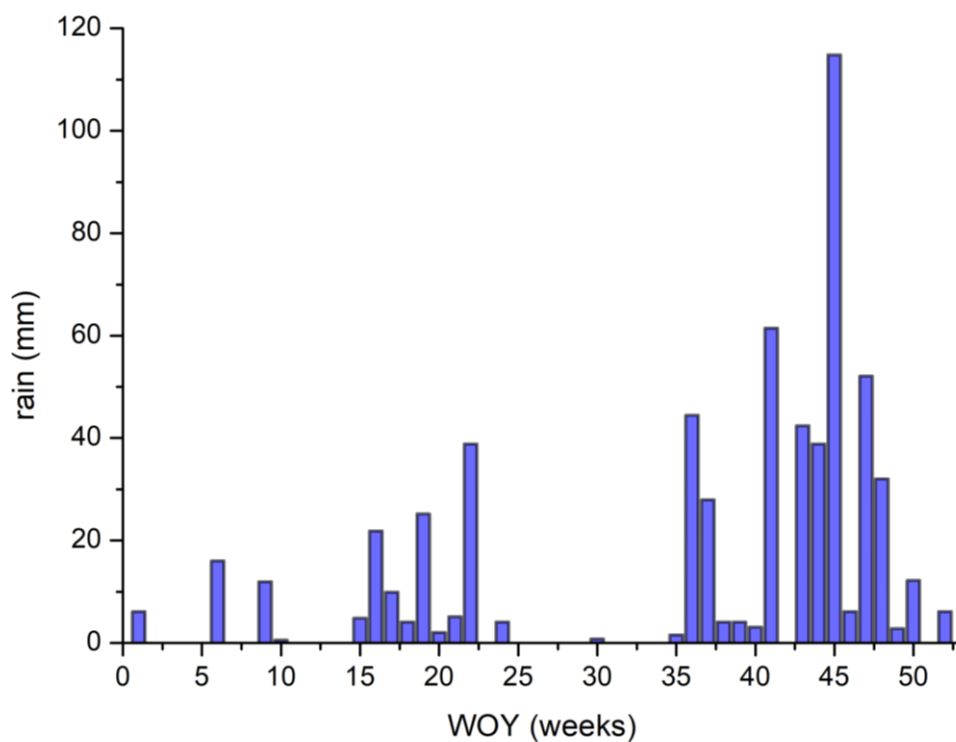

**Figure S4** – Rain (mm) fallen weekly in the study area (cumulative daily value).

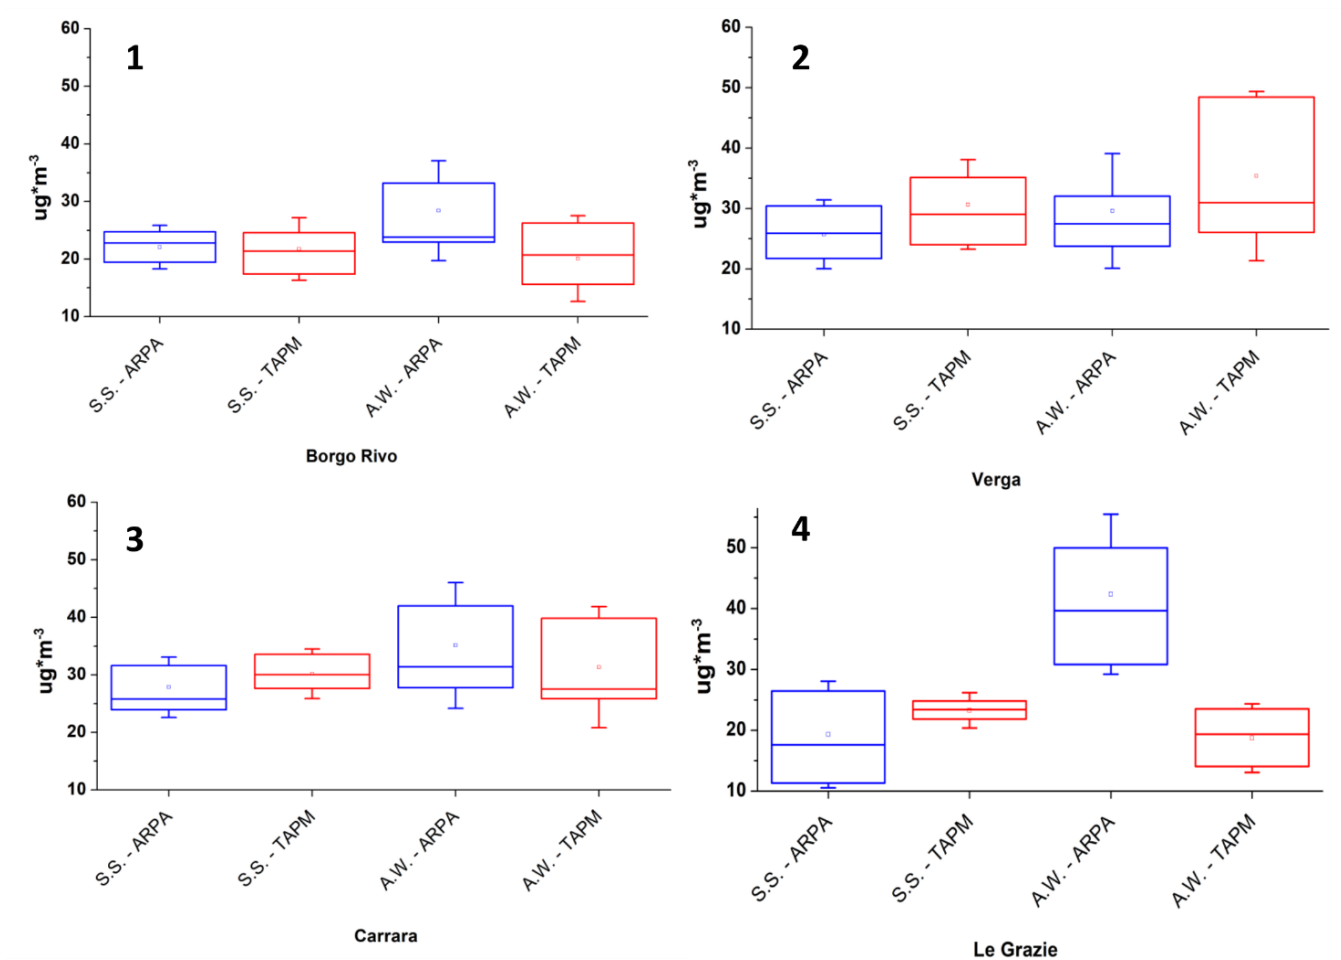

**Figure S5** – Boxplot for seasonal average comparison: spring - summer (S.S.) and autumn - winter (A.W.). PM10 air concentration data ( $\mu\text{g}\cdot\text{m}^{-3}$ ) comparison between TAPM model predictions (red boxes) and ECS - ARPA ground data (blue boxes). The four districts are (1) Borgo Rivo, (2) Verga, (3) Carrara, (4) Le Grazie.

**Table S1** – Detailed values of averages, and relative standard errors of all results from Leaf sampling data, Environmental Control Stations and Model output.

|                                                      | Record      | Borgo Rivo  | s.e.      | Verga       | s.e.       | Carrara     | s.e.      | Le Grazie   | s.e.      |
|------------------------------------------------------|-------------|-------------|-----------|-------------|------------|-------------|-----------|-------------|-----------|
| LEAF SAMPLING<br>( $\mu\text{g}\cdot\text{m}^{-2}$ ) | Jan         | 23.5        | $\pm 5.4$ | 14.2        | $\pm 2.6$  | 11.1        | $\pm 3.5$ | 23.7        | $\pm 2.9$ |
|                                                      | Apr         | 11.3        | $\pm 1.3$ | 12.6        | $\pm 1.8$  | 18.5        | $\pm 1.8$ | 28.1        | $\pm 2.3$ |
|                                                      | Aug         | 25.8        | $\pm 2.1$ | 21.4        | $\pm 2.2$  | 19.8        | $\pm 1.2$ | 25.9        | $\pm 1.9$ |
|                                                      | Oct         | 17.8        | $\pm 1.8$ | 22.0        | $\pm 1.3$  | 25.9        | $\pm 2.9$ | 25.3        | $\pm 2.6$ |
|                                                      | Jan '13     | 15.7        | $\pm 1.4$ | 12.5        | $\pm 1.6$  | 17.8        | $\pm 1.3$ | 19.1        | $\pm 1.9$ |
|                                                      | <b>AVG</b>  | <b>18.8</b> | $\pm 2.6$ | <b>16.5</b> | $\pm 2.1$  | <b>18.6</b> | $\pm 2.4$ | <b>24.4</b> | $\pm 1.5$ |
| ECS (ARPA)<br>( $\mu\text{g}\cdot\text{m}^{-3}$ )    | Apr         | 18.9        | $\pm 1.6$ | 22.7        | $\pm 5.1$  | 22.5        | $\pm 0.5$ | 23.5        | $\pm 4.1$ |
|                                                      | Aug         | 15.8        | $\pm 0.1$ | 31.7        | $\pm 0.3$  | 32.0        | $\pm 1.9$ | 15.8        | $\pm 5.0$ |
|                                                      | Oct         | 25.5        | $\pm 0.2$ | 29.0        | $\pm 3.6$  | 30.8        | $\pm 2.7$ | 47.3        | $\pm 1.4$ |
|                                                      | Jan '13     | 26.1        | $\pm 0.3$ | 37.5        | $\pm 10.1$ | 44.4        | $\pm 8.2$ | 53.6        | $\pm 6.4$ |
|                                                      | <b>A.W.</b> | <b>27.7</b> | $\pm 1.2$ | <b>30.8</b> | $\pm 1.2$  | <b>34.3</b> | $\pm 1.5$ | <b>40.4</b> | $\pm 1.9$ |
|                                                      | <b>S.S.</b> | <b>22.9</b> | $\pm 1.3$ | <b>24.8</b> | $\pm 1.4$  | <b>27.9</b> | $\pm 1.7$ | <b>21.2</b> | $\pm 2.3$ |
| TAPM (MODEL)<br>( $\mu\text{g}\cdot\text{m}^{-3}$ )  | Apr         | 15.6        | $\pm 1.6$ | 22.5        | $\pm 1.5$  | 29.0        | $\pm 1.0$ | 23.1        | $\pm 0.3$ |
|                                                      | Aug         | 23.8        | $\pm 0.1$ | 28.9        | $\pm 0.1$  | 31.6        | $\pm 1.5$ | 23.8        | $\pm 1.0$ |
|                                                      | Oct         | 28.1        | $\pm 0.2$ | 42.9        | $\pm 6.0$  | 40.6        | $\pm 3.2$ | 25.4        | $\pm 0.4$ |
|                                                      | Jan '13     | 21.3        | $\pm 0.3$ | 53.5        | $\pm 0.6$  | 42.3        | $\pm 1.6$ | 25.3        | $\pm 1.9$ |
|                                                      | <b>A.W.</b> | <b>20.2</b> | $\pm 1.0$ | <b>39.7</b> | $\pm 1.8$  | <b>34.0</b> | $\pm 1.3$ | <b>20.5</b> | $\pm 0.8$ |
|                                                      | <b>S.S.</b> | <b>21.2</b> | $\pm 0.7$ | <b>27.5</b> | $\pm 1.6$  | <b>28.1</b> | $\pm 1.0$ | <b>21.6</b> | $\pm 0.5$ |

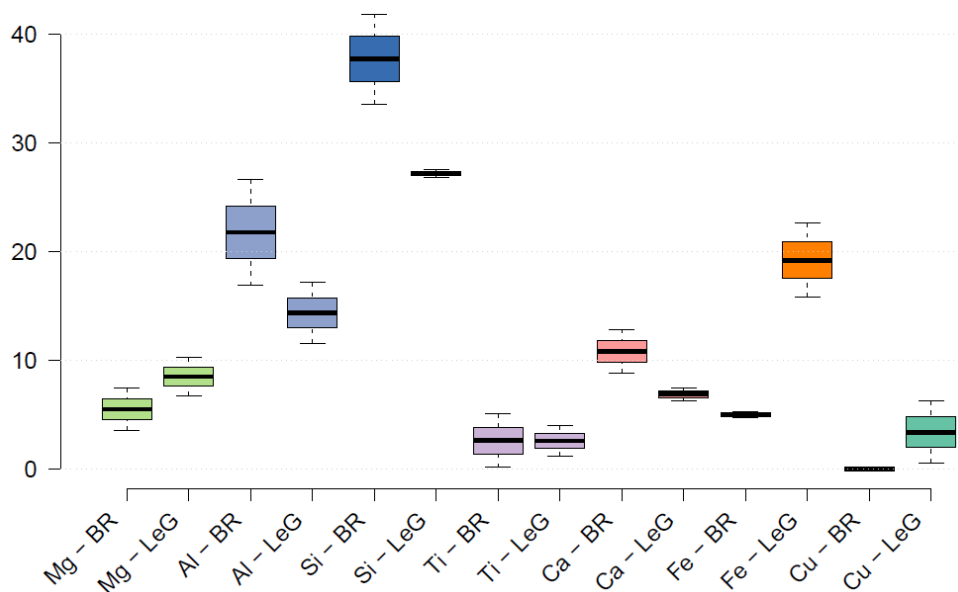

**Figure S6** – Elemental composition of PM10 (main elements comparison in percentage - %) on filters from V/F analysis for two districts (BR – Borgo Rivo and LeG – Le Grazie).
